# Supplementary material for: Pyrocatalysis—The DCF assay as a pH-robust tool to determine the oxidation capability of thermally excited pyroelectric powders
Source: PLOS journal article supplement (doi:10.1371/journal.pone.0228644), 2020-02-06
Supplement: S5 (10.1371/journal.pone.0228644.s005) [file journal.pone.0228644.s005]

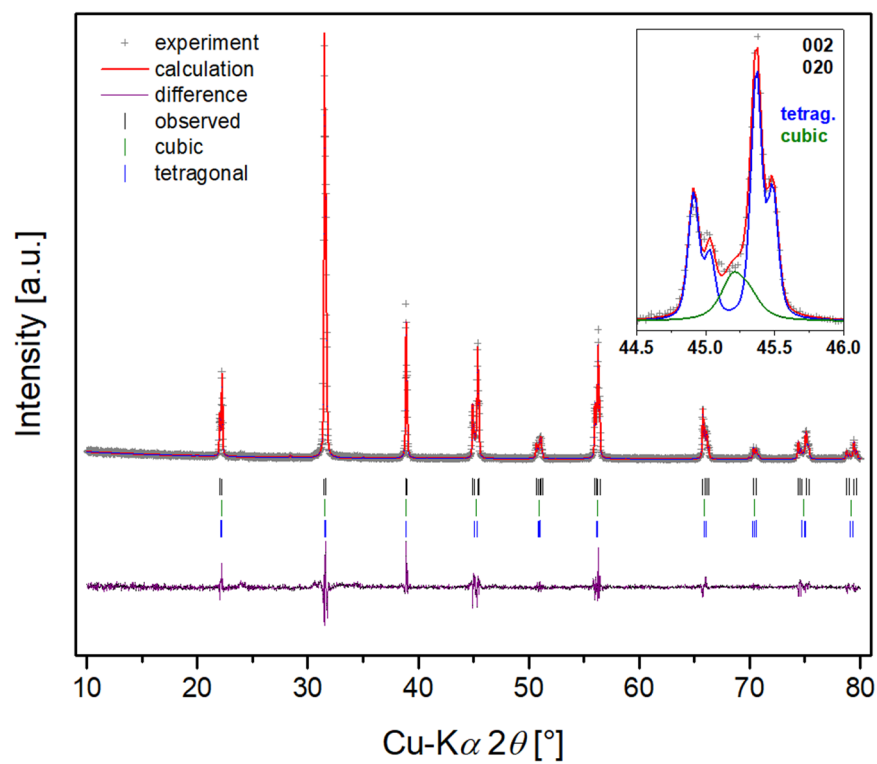

**Figure S1.** XRD diffraction Rietveld refinement results of BaTiO<sub>3</sub> powder. Inset shows composition of 002/020 reflection with respect to cubic and tetragonal fraction.
