# Supplementary material for: Pyrocatalysis—The DCF assay as a pH-robust tool to determine the oxidation capability of thermally excited pyroelectric powders
Source: PLOS journal article supplement (doi:10.1371/journal.pone.0228644), 2020-02-06
Supplement: S7 (10.1371/journal.pone.0228644.s007) [file journal.pone.0228644.s007]

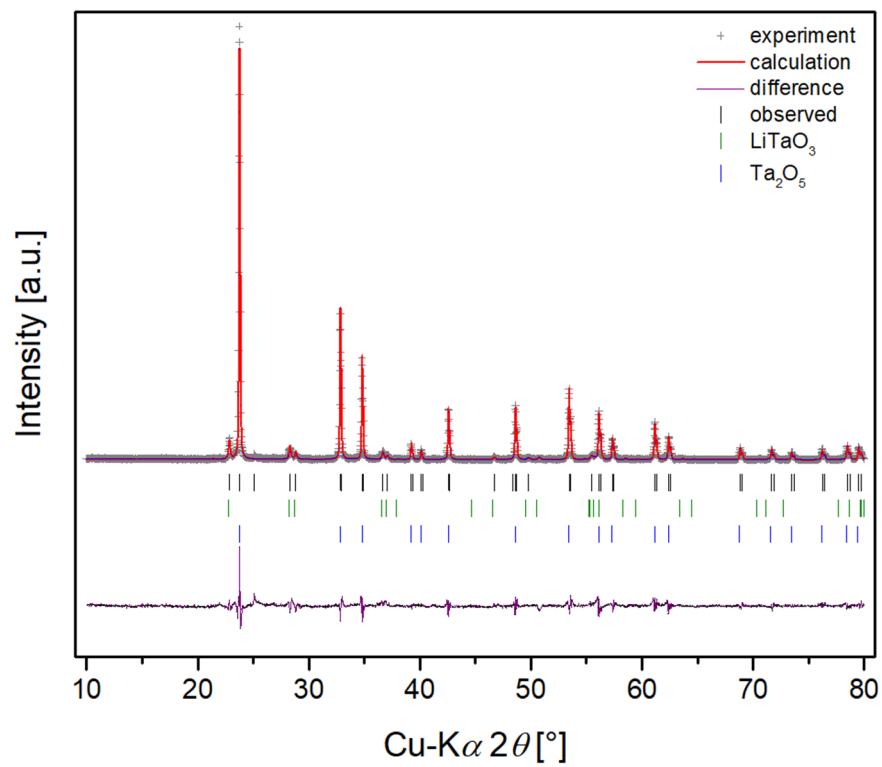

**Figure S1.** XRD diffraction Rietveld refinement results of  $\text{LiTaO}_3$  powder with 11%  $\text{Ta}_2\text{O}_5$  content.
